# Supplementary material for: Preparation of Polystyrene Microsphere-Templated Porous Monolith for Wastewater Filtration
Source: MDPI journal article supplement (doi:10.3390/ma14237165), 2021-11-25
Supplement: s1 [file s1]

## SUPPLEMENTARY MATERIALS

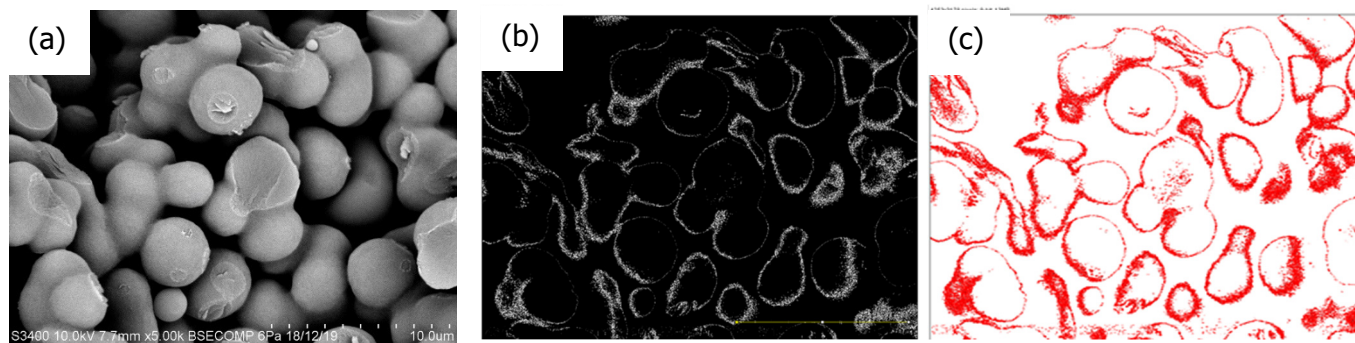

**Figure S1.** Images of monolith outer part at 50:50 template/monomer ratio. (a) Original SEM image, (b) threshold of the image was set, and (c) the particle outline created with Image J software for the particle size measurement.

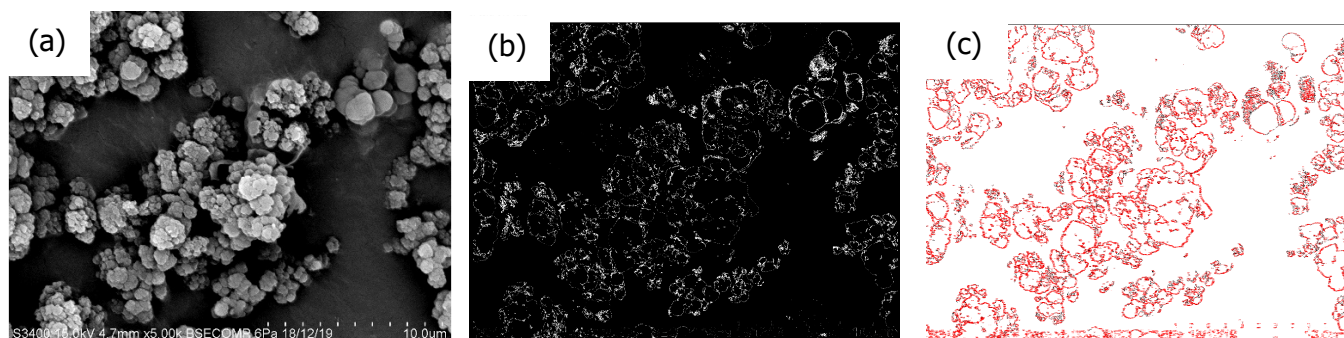

**Figure S2.** Same as Figure S1 for middle part at 50:50 template/monomer ratio.

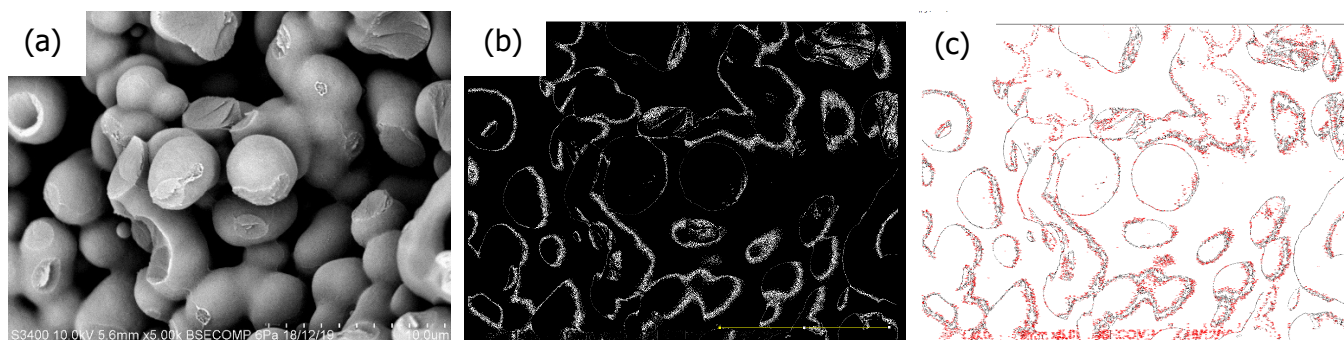

**Figure S3.** Same as Figure S1 for inner part at 50:50 template/monomer ratio.

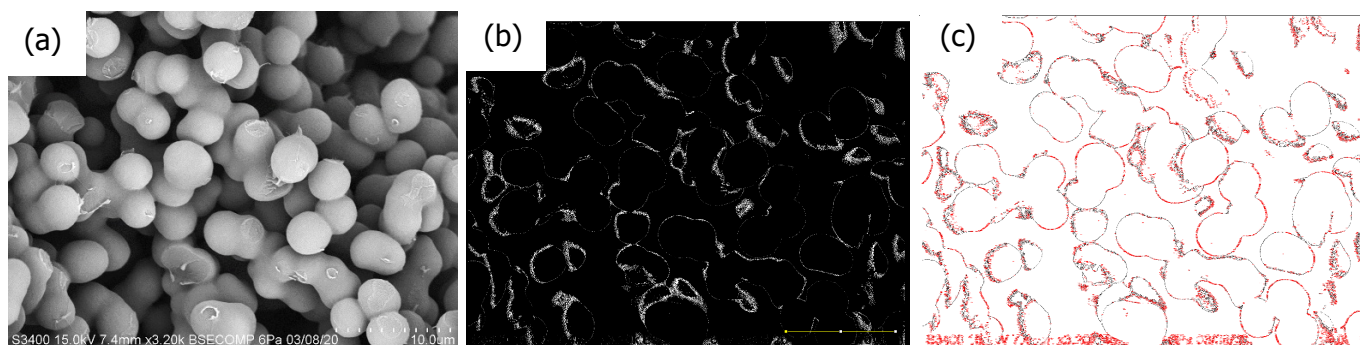

**Figure S4.** Same as Figure S1 for outer part at 60:40 template/monomer ratio.

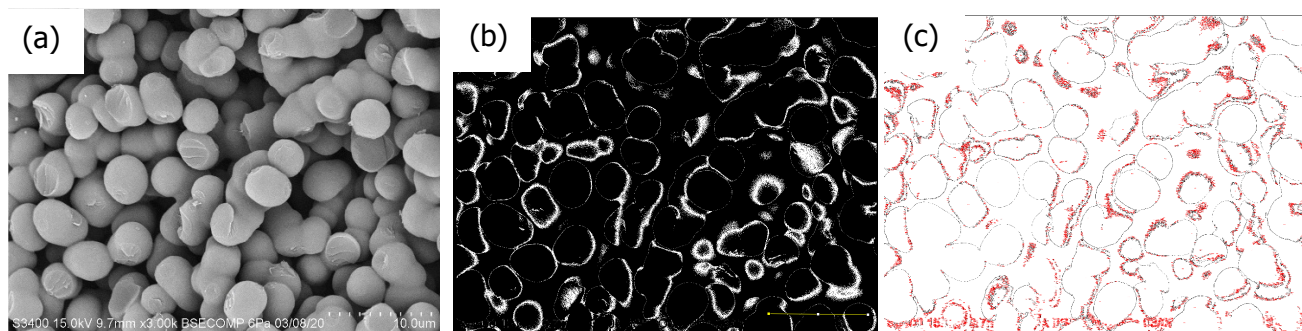

**Figure S5.** Same as Figure S1 for middle part at 60:40 template/monomer ratio.

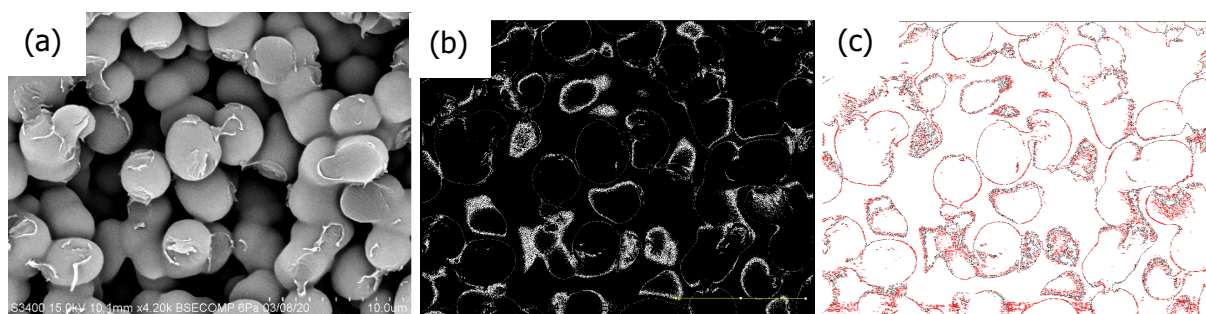

**Figure S6.** Same as Figure S1 for inner part at 60:40 template/monomer ratio.

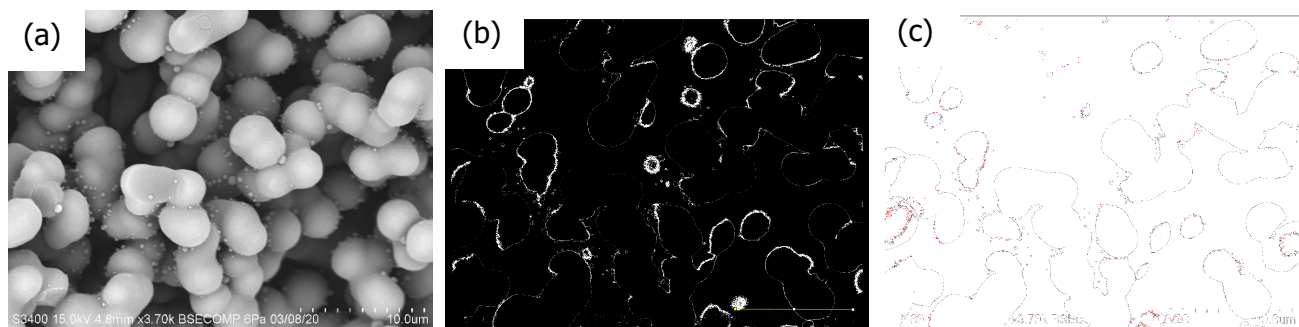

**Figure S7.** Same as Figure S1 for outer part at 70:30 template/monomer ratio.

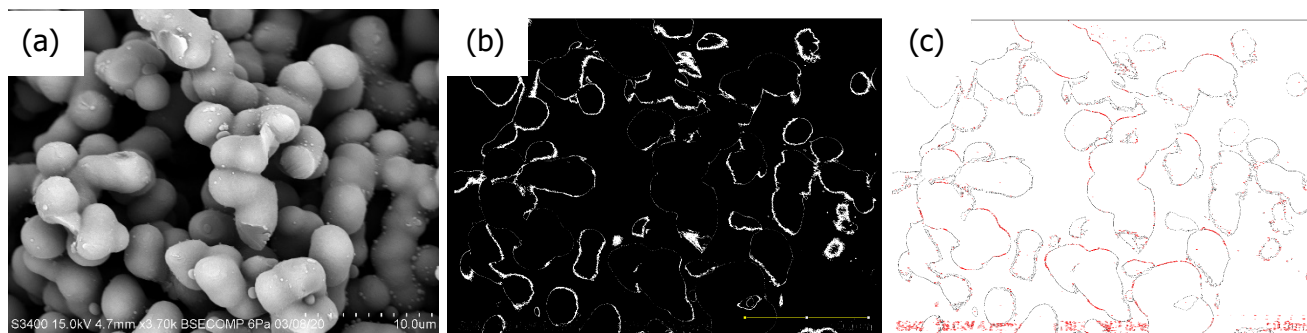

**Figure S8.** Same as Figure S1 for middle part at 70:30 template/monomer ratio.

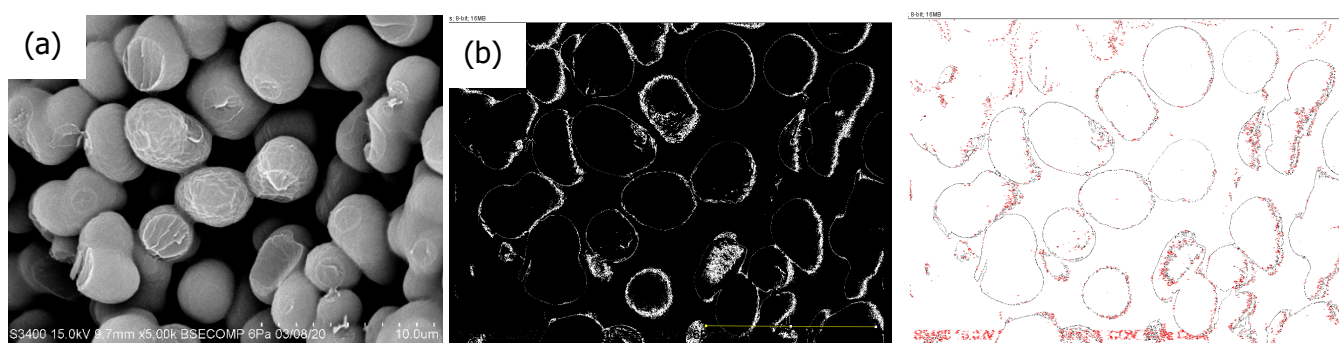

**Figure S9.** Same as Figure S1 for inner part at 70:30 template/monomer ratio.
